# Supplementary material for: Regulation of the regeneration of intestinal stem cells after irradiation
Source: PubMed Central journal article supplement — Ann Transl Med. 2020 Sep;8(17):1063. doi: 10.21037/atm-20-4542 (PMC7575967; doi:10.21037/atm-20-4542), 2020-09
Supplement: atm-08-17-1063-dss.pdf [file atm-08-17-1063-dss.pdf]

## Data Sharing Statement

|                     |                                                                                                                                                    |                                                                                                                  |
|---------------------|----------------------------------------------------------------------------------------------------------------------------------------------------|------------------------------------------------------------------------------------------------------------------|
| <b>Article Info</b> | <a href="http://dx.doi.org/10.21037/atm-20-4542">http://dx.doi.org/10.21037/atm-20-4542</a>                                                        |                                                                                                                  |
| <b>Item</b>         | <b>Question</b>                                                                                                                                    | <b>Authors' Response<br/>(place "-" if not applicable)</b>                                                       |
| 1                   | Would you like to share data collected for your study to others?                                                                                   | Yes.                                                                                                             |
| 2                   | If not, would you like to share the reason for your decision?                                                                                      | -                                                                                                                |
| 3                   | What data in particular will be shared?                                                                                                            | The data that this paper showed.                                                                                 |
| 4                   | Any other documents will be share? Such as study protocol, statistical analysis plan, informed consent form, clinical study report, analytic code. | The study protocol, Statistical analysis plan will also be shared if requested.                                  |
| 5                   | When will data availability begin?                                                                                                                 | From the publication time.                                                                                       |
| 6                   | When will data availability end?                                                                                                                   | Forever.                                                                                                         |
| 7                   | To whom will you share the data?                                                                                                                   | Researchers who are interested in the study of the regeneration of intestine stem cells.                         |
| 8                   | For what type of analysis or purpose?                                                                                                              | For research about the regeneration of intestine stem cells.                                                     |
| 9                   | How or where can the data/documents be obtained?                                                                                                   | Emails could be sent to the address below to obtain the shared data: llp_8521@hotmail.com                        |
| 10                  | Any other restrictions?                                                                                                                            | We may balance the potential benefits and risks for each request and then provide the data that could be shared. |
